# Supplementary material
Source: PubMed Central journal article supplement (PMC8014234)
Supplement: MJA2-214-279-s001.pdf [file MJA2-214-279-s001.pdf]

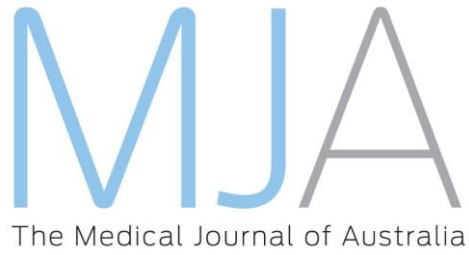

## **Supporting Information**

### **Supplementary methods and results**

**This appendix was part of the submitted manuscript and has been peer reviewed.  
It is posted as supplied by the authors.**

Appendix to: Darley DR, Dore GJ, Cysique L, et al. Persistent symptoms up to four months after community and hospital-managed SARS-CoV-2 infection. *Med J Aust* 2021; doi: 10.5694/mja2.50963.

**Figure 1. Participant selection and assessment**

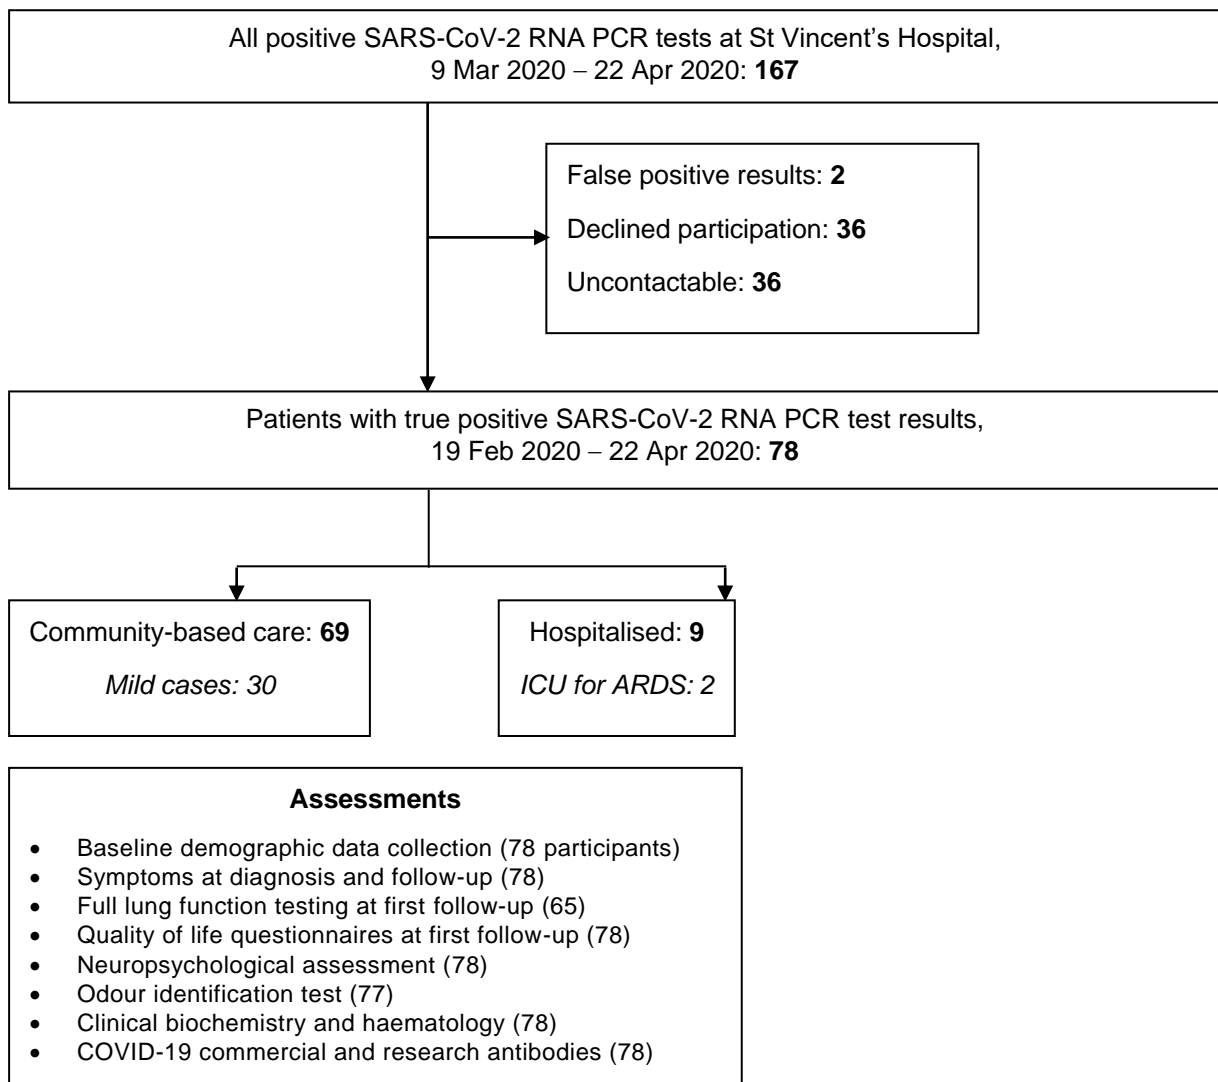

ARDS = acute respiratory distress syndrome; COVID-19 = coronavirus disease 2019; ICU = intensive care unit; PCR = polymerase chain reaction; SARS-CoV-2 = severe acute respiratory syndrome coronavirus 2.

**Table 1. Definitions of ADAPT cohort sub-populations**

| Sub-population |                                                                                                                                                                                                                                                                                          |
|----------------|------------------------------------------------------------------------------------------------------------------------------------------------------------------------------------------------------------------------------------------------------------------------------------------|
| Mild           | Managed in the community; minor, largely upper respiratory tract viral symptoms, including sore throat, rhinorrhoea, headache, and anosmia/ageusia                                                                                                                                       |
| Moderate       | Managed in the community with fever/chills <b>AND</b> one of the following organ-localising symptoms, <b>OR</b> at least two of the following organ-localising symptoms: cough, haemoptysis, shortness of breath, chest pain, nausea/vomiting, diarrhea, altered consciousness/confusion |
| Severe         | Required inpatient care (wards or intensive care unit)                                                                                                                                                                                                                                   |

**Table 2. Patient characteristics at the time of COVID-19 presentation**

| Patient characteristic              | All patients | Community | Hospitalised |
|-------------------------------------|--------------|-----------|--------------|
| Number of patients                  | 78           | 69        | 9            |
| Age at diagnosis (years), mean (SD) | 47 (16)      | 45 (15)   | 62 (8.6)     |
| Sex (women)                         | 27           | 27        | 0            |
| Ethnic background (European)        | 65           | 57        | 8            |
| Epidemiology                        |              |           |              |
| - Overseas travel                   | 39           | 35        | 4            |
| - Known close contact               | 38           | 32        | 6            |
| - Presence in a high-risk setting   | 15           | 12        | 3            |
| Comorbid conditions                 |              |           |              |
| - None                              | 37           | 36        | 1            |
| - Hypertension                      | 14           | 12        | 2            |
| - Diabetes mellitus                 | 7            | 3         | 4            |
| - Chronic cardiac disease           | 8            | 5         | 3            |
| - Chronic lung disease              | 1            | 1         | 0            |
| - Asthma                            | 9            | 8         | 1            |
| - Chronic kidney disease            | 3            | 2         | 1            |
| - Cancer                            | 7            | 6         | 1            |
| - Immune disorders                  | 3            | 3         | 0            |
| - Obesity                           | 3            | 2         | 1            |
| - Obstructive sleep apnoea          | 1            | 1         | 0            |
| - Psychiatric diagnosis             | 6            | 6         | 0            |
| Smoking (ever)                      | 29           | 21        | 8            |
| Highest education level             |              |           |              |
| - University                        | 61           | 54        | 7            |
| - High school                       | 14           | 13        | 1            |
| ICU admission for ARDS              | 2            | —         | 2            |

ARDS = acute respiratory distress syndrome; ICU = intensive care unit.
